# Supplementary material for: Pure heterometallic spodium bonding
Source: Royal Society of Chemistry journal article supplement (doi:10.1039/d4ce00825a), 2024-01-01
Supplement: d4ce00825a1.pdf [file d4ce00825a1.pdf]

## Electronic Supporting Information

### Pure Heterometallic Spodium Bonding

Anton V. Rozhkov,<sup>\*a</sup> Elena Yu. Tupikina,<sup>a</sup> Kirill I. Tugashov,<sup>b</sup> Vadim Yu. Kukushkin<sup>\*a,c</sup>

(a) Institute of Chemistry, Saint Petersburg State University Universitetskaya Nab. 7/9, 199034 Saint Petersburg, Russian Federation

E-mails: [a.rozhkov@spbu.ru](mailto:a.rozhkov@spbu.ru), [v.kukushkin@spbu.ru](mailto:v.kukushkin@spbu.ru)

(b) A.N. Nesmeyanov Institute of Organoelement Compounds, Russian Academy of Sciences, Vavilova Str. 28, 119991 Moscow, Russian Federation

(c) Institute of Chemistry and Pharmaceutical Technologies, Altai State University, 656049 Barnaul, Russian Federation

## Contents

|                                                                                                                                            |    |
|--------------------------------------------------------------------------------------------------------------------------------------------|----|
| S1. Crystal data and structure refinement.....                                                                                             | 3  |
| S2. The Cambridge Structural Database (CSD) search for short Ph <sup>F</sup> Hg···M contacts .....                                         | 4  |
| S3. Theoretical considerations.....                                                                                                        | 11 |
| S4. Cartesian coordinates for the studied [M(acac) <sub>2</sub> (Ph <sup>F</sup> <sub>2</sub> Hg)] <sub>3</sub> (M = Pt, Pd) systems ..... | 17 |
| S5. References .....                                                                                                                       | 40 |

## S1. Crystal data and structure refinement

**Table S1.** Crystal data and structure refinement for  $\text{Ph}^{\text{F}_2}\text{Hg}\cdot\text{Pd}(\text{acac})_2$  and  $\text{Ph}^{\text{F}_2}\text{Hg}\cdot\text{Pt}(\text{acac})_2$

| Identification code                        | $\text{Ph}^{\text{F}_2}\text{Hg}\cdot\text{Pd}(\text{acac})_2$ | $\text{Ph}^{\text{F}_2}\text{Hg}\cdot\text{Pt}(\text{acac})_2$ |
|--------------------------------------------|----------------------------------------------------------------|----------------------------------------------------------------|
| Empirical formula                          | $\text{C}_{22}\text{H}_{14}\text{F}_{10}\text{HgO}_4\text{Pd}$ | $\text{C}_{22}\text{H}_{14}\text{F}_{10}\text{HgO}_4\text{Pt}$ |
| Formula weight                             | 839.32                                                         | 928.01                                                         |
| Temperature, K                             | 100(2)                                                         | 100(2)                                                         |
| Crystal size, mm                           | $0.12 \times 0.04 \times 0.02$                                 | $0.06 \times 0.04 \times 0.03$                                 |
| Wavelength, Å                              | 1.54184                                                        | 1.54184                                                        |
| Crystal system                             | monoclinic                                                     | monoclinic                                                     |
| Space group                                | I2/m                                                           | I2/m                                                           |
| $a$ , Å                                    | 11.8573(9)                                                     | 11.8245(3)                                                     |
| $b$ , Å                                    | 6.2066(5)                                                      | 6.2102(2)                                                      |
| $c$ , Å                                    | 15.9257(12)                                                    | 15.9199(4)                                                     |
| $\alpha$ , deg.                            | 90                                                             | 90                                                             |
| $\beta$ , deg.                             | 99.161(7)                                                      | 99.276(2)                                                      |
| $\gamma$ , deg.                            | 90                                                             | 90                                                             |
| $V$ , Å <sup>3</sup>                       | 1157.08(16)                                                    | 1153.75(6)                                                     |
| $Z$                                        | 2                                                              | 2                                                              |
| Density (calc.), g/cm <sup>3</sup>         | 2.409                                                          | 2.671                                                          |
| $\mu$ , mm <sup>-1</sup>                   | 19.045                                                         | 23.988                                                         |
| $F(000)$                                   | 788.0                                                          | 824.0                                                          |
| $2\theta$ range for data collection, deg.  | 8.67 to 144.78                                                 | 8.68 to 159.698                                                |
| Index ranges                               | $-14 \leq h \leq 14, -6 \leq k \leq 7, -19 \leq l \leq 19$     | $-14 \leq h \leq 15, -7 \leq k \leq 7, -19 \leq l \leq 20$     |
| Reflections collected                      | 3301                                                           | 6349                                                           |
| Independent reflections                    | 1210 [ $R_{\text{int}} = 0.0620, R_{\text{sigma}} = 0.0449$ ]  | 1336 [ $R_{\text{int}} = 0.0545, R_{\text{sigma}} = 0.0325$ ]  |
| $R_1 / wR_2$ ( $I > 2\sigma(I)$ )          | 0.0405/0.1134                                                  | 0.0348/0.0964                                                  |
| $R_1 / wR_2$ (all data)                    | 0.0408/0.1137                                                  | 0.0358/0.0981                                                  |
| Goodness-of-fit on $F^2$                   | 1.189                                                          | 1.174                                                          |
| Largest diff. peak/hole, e Å <sup>-3</sup> | 0.24/-0.21                                                     | 2.00/-1.54                                                     |

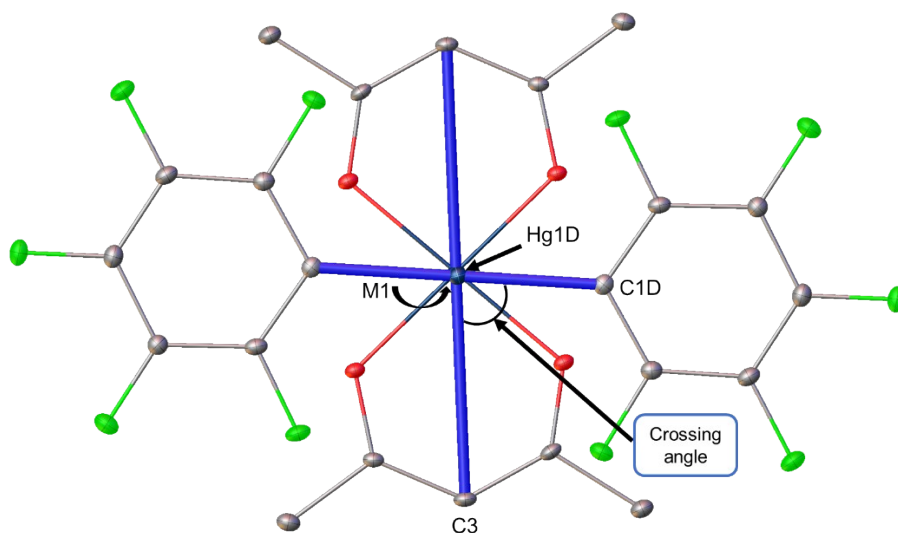

**Figure S1.** Schematic representation of the crossing angle.

## S2. The Cambridge Structural Database (CSD) search for short $\text{Ph}^{\text{F}}\text{Hg}\cdots\text{M}$ contacts

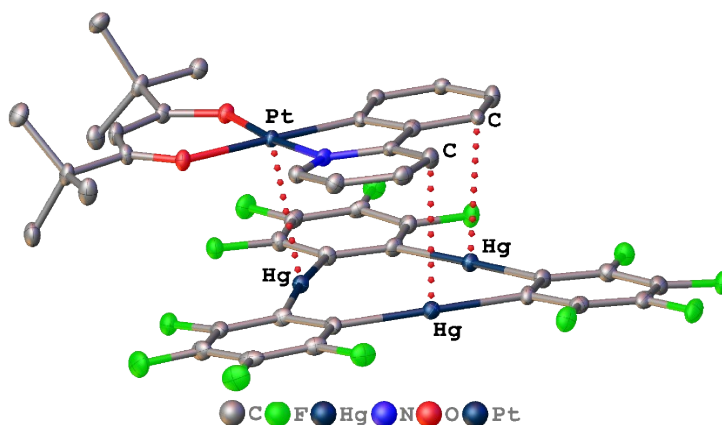

**Figure S2.** A view of the molecular structure of the cocrystal from ref. 24. The identified SpB contacts are shown by dotted lines; H-atoms were omitted for clarity.

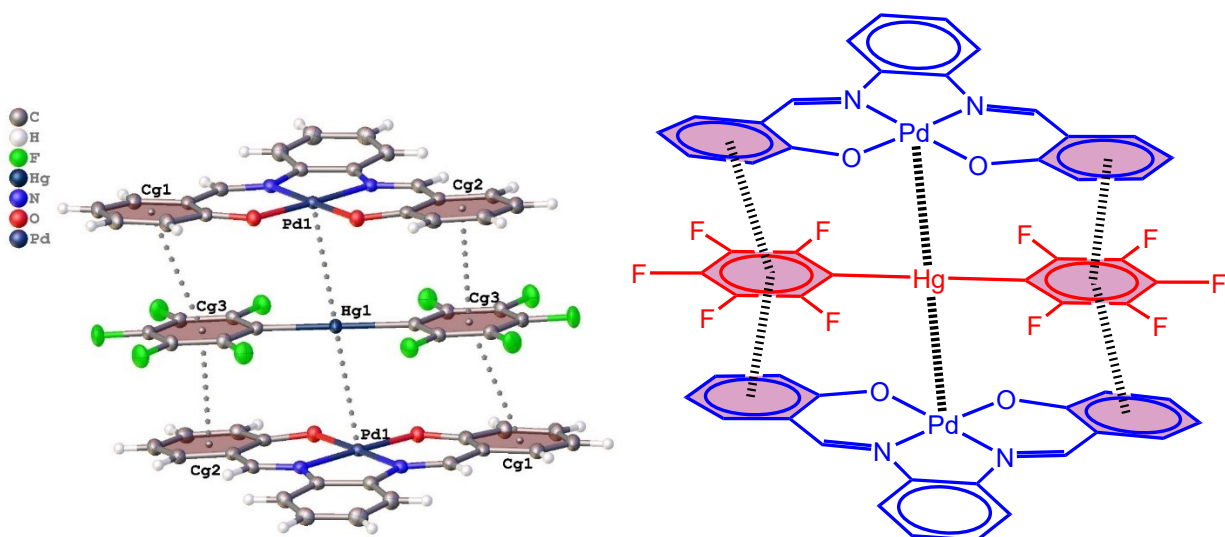

**Figure S3.** A fragment of the crystal structure of COJBIN (left) and its graphical representation (right) showing structure-determining NCIs (dotted lines).

**Table S2.** Parameters of short contacts in COJBIN.

| Contact   | d, Å       | R <sup>a</sup> , % |
|-----------|------------|--------------------|
| Hg1···Pd1 | 3.2841(2)  | 103                |
| Cg1···Cg3 | 3.5675(11) |                    |
| Cg2···Cg3 | 3.4095(11) |                    |

<sup>a</sup>Normalization of the experimentally observed  $\text{Ch}\cdots(\text{ChB}_{\text{acceptor}})$  distances to the corresponding Bondi  $\sum_{\text{vdW}}^1$

Becke surface mapped by normalized contact distance  $d_{\text{norm}}$

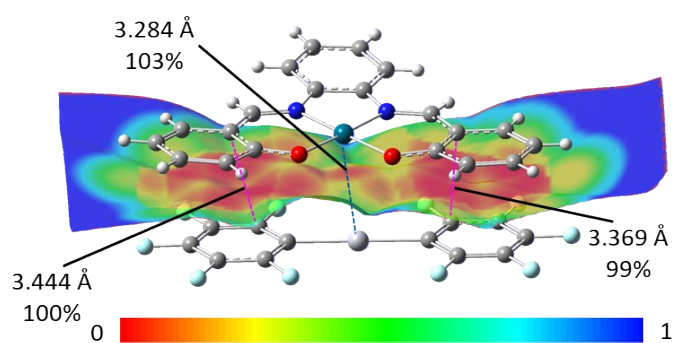

IRI isosurface (1.0) mapped by  $\text{sign}(\lambda_2)\rho$

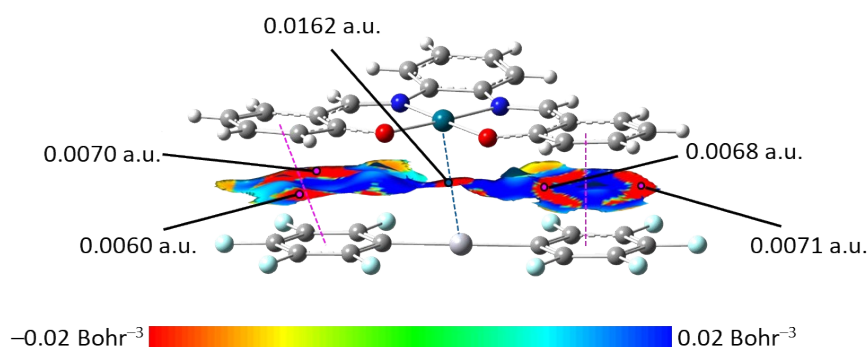

|                | Geometric criteria | Electron density criteria |
|----------------|--------------------|---------------------------|
| Pd...Hg        | no                 | yes                       |
| $\pi\cdots\pi$ | borderline         | yes                       |

**Figure S4.** Theoretical analysis of COJBIN. Top: Becke surface mapped by normalized contact

distance  $d_{\text{norm}} = \frac{d_1 - r_1^{\text{vdW}}}{r_1^{\text{vdW}}} + \frac{d_2 - r_2^{\text{vdW}}}{r_2^{\text{vdW}}}$ , where  $d_1$  ( $d_2$ ) is the distance from a point on the surface to the nearest nucleus inside (outside) the surface,  $r_1^{\text{vdW}}$  and  $r_2^{\text{vdW}}$  denote van der Waals radius of atoms 1 and 2. Interatomic distances for contacts with low  $d_{\text{norm}}$  values and their percentage of the sum of van der Waals radii are given in black. Middle: IRI isosurface (1.0) mapped by  $\text{sign}(\lambda_2)\rho$ , electron density critical points of (3; -1) type and  $\rho$  values. Bottom: table summarizing the results of the two-criterion test for non-covalent interactions (see Computational Details section).

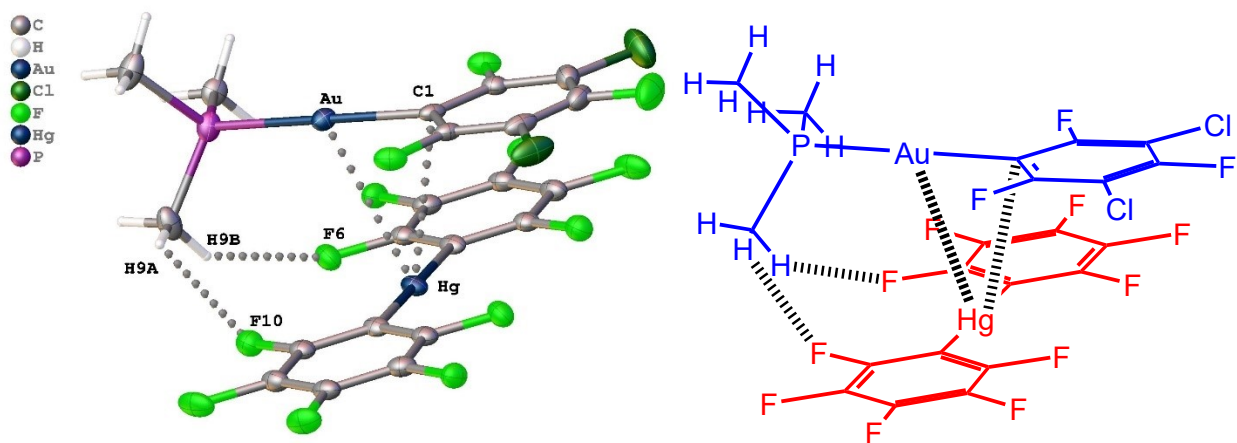

**Figure S5.** A fragment of the crystal structure of KEWWIU (left) and its graphical representation (right) showing structure-determining NCI (dotted lines).

**Table S3.** Parameters of short contacts in KEWWIU.

| Contact   | d, Å      | R <sup>a</sup> , % |
|-----------|-----------|--------------------|
| Hg···Au   | 3.2865(3) | 102                |
| Hg···C1   | 3.219(6)  | 99                 |
| H9B···F6  | 2.522(4)  | 94                 |
| H9A···F10 | 2.578(5)  | 97                 |

<sup>a</sup>Normalization of the experimentally observed  $\text{Ch}\cdots(\text{ChB}_{\text{acceptor}})$  distances to the corresponding Bondi  $\sum_{\text{vdW}}^1$

### Becke surface mapped by normalized contact distance $d_{norm}$

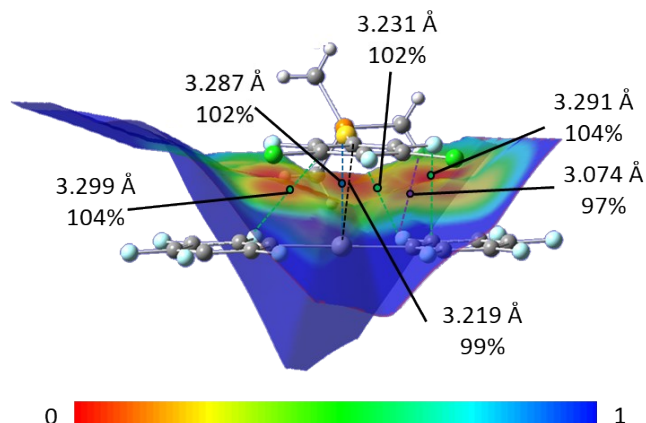

### IRI isosurface (1.0) mapped by $\text{sign}(\lambda_2)\rho$

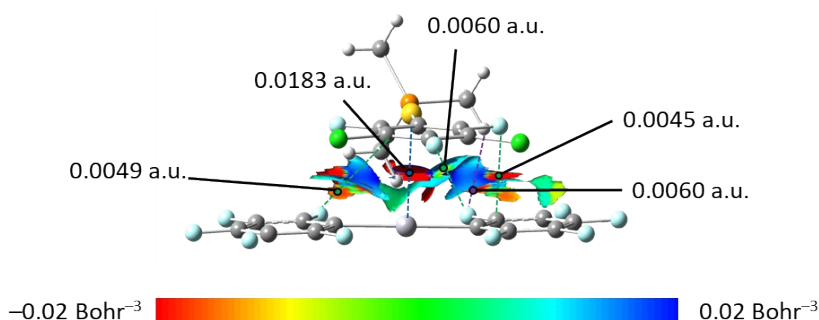

|                | Geometric criteria | Electron density criteria |
|----------------|--------------------|---------------------------|
| Au...Hg        | no                 | yes                       |
| Hg...C         | yes                | no                        |
| LP(F)... $\pi$ | no                 | borderline                |
| CH...F         | in part            | yes                       |

**Figure S6.** Theoretical analysis of KEWWIU. Top: Becke surface mapped by normalized contact

distance  $d_{norm} = \frac{d_1 - r_1^{vdW}}{r_1^{vdW}} + \frac{d_2 - r_2^{vdW}}{r_2^{vdW}}$ , where  $d_1$  ( $d_2$ ) is the distance from a point on the surface to the nearest nucleus inside (outside) the surface,  $r_1^{vdW}$  and  $r_2^{vdW}$  denote van der Waals radius of atoms 1 and 2. Interatomic distances for contacts with low  $d_{norm}$  values and their percentage of the sum of van der Waals radii are given in black. Middle: IRI isosurface (1.0) mapped by  $\text{sign}(\lambda_2)\rho$ , electron density critical points of (3; -1) type and  $\rho$  values. Bottom: table summarizing the results of the two-criterion test for non-covalent interactions (see Computational Details section).



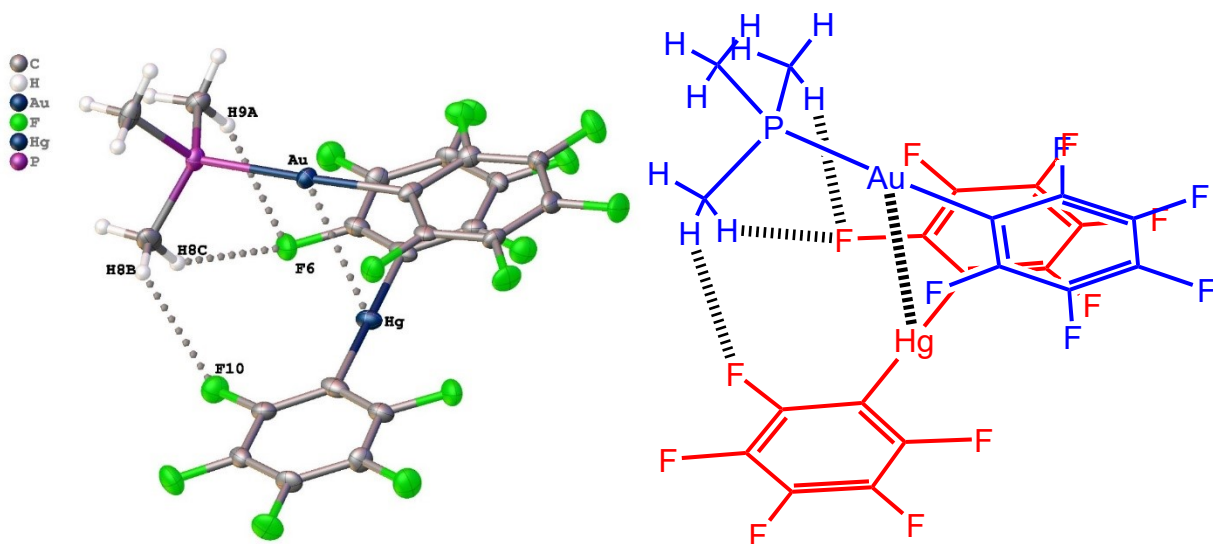

**Figure S7.** A fragment of the crystal structure of ITEBUF (left) and its graphical representation (right) showing structure-determining NCIIs (dotted lines).

**Table S4.** Parameters of short contacts in ITEBUF.

| Contact   | d, Å      | R <sup>a</sup> , % |
|-----------|-----------|--------------------|
| Hg···Au   | 3.1860(3) | 99                 |
| H8C···F6  | 2.650(3)  | 99                 |
| H9A···F6  | 2.625(4)  | 98                 |
| H8B···F10 | 2.544(3)  | 95                 |

<sup>a</sup>Normalization of the experimentally observed Ch···(ChB<sub>acceptor</sub>) distances to the corresponding Bondi  $\sum_{vdW}^1$

### Becke surface mapped by normalized contact distance $d_{\text{norm}}$

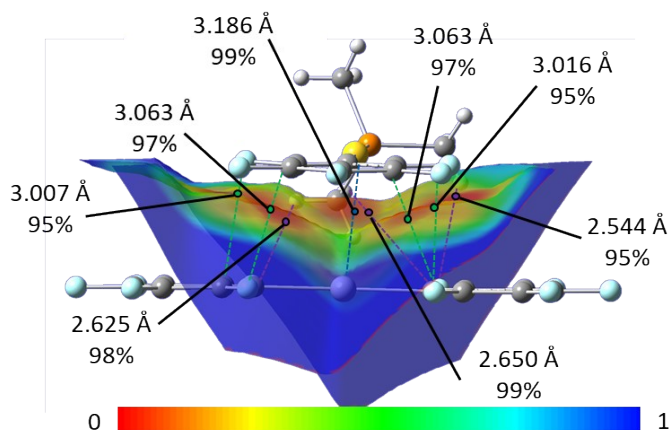

### IRI isosurface (1.0) mapped by $\text{sign}(\lambda_2)\rho$

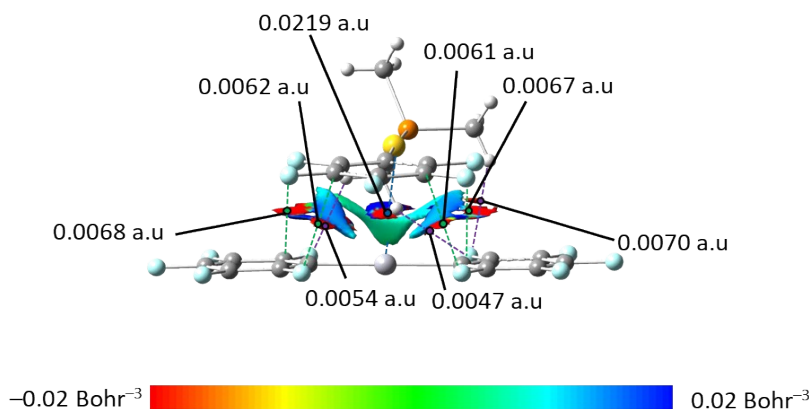

|                | Geometric criteria | Electron density criteria |
|----------------|--------------------|---------------------------|
| Au...Hg        | yes                | yes                       |
| LP(F)... $\pi$ | yes                | yes                       |
| CH...F         | yes                | in part                   |

**Figure S8.** Theoretical analysis of ITEBUF. Top: Becke surface mapped by normalized contact

distance  $d_{\text{norm}} = \frac{d_1 - r_1^{\text{vdW}}}{r_1^{\text{vdW}}} + \frac{d_2 - r_2^{\text{vdW}}}{r_2^{\text{vdW}}}$ , where  $d_1$  ( $d_2$ ) is the distance from a point on the surface to the nearest nucleus inside (outside) the surface,  $r_1^{\text{vdW}}$  and  $r_2^{\text{vdW}}$  denote van der Waals radius of atoms 1 and 2. Interatomic distances for contacts with low  $d_{\text{norm}}$  values and their percentage of the sum of van der Waals radii are given in black. Middle: IRI isosurface (1.0) mapped by  $\text{sign}(\lambda_2)\rho$ , electron density critical points of (3; -1) type and  $\rho$  values. Bottom: table summarizing the results of the two-criterion test for non-covalent interactions (see Computational Details section).

### S3. Theoretical considerations

To confirm that short Hg···Pt/Pd contacts in the  $M(\text{acac})_2(\text{Ph}^{\text{F}}_2\text{Hg})$  cocrystals are structure-determining, we optimized the geometry of  $[M(\text{acac})_2(\text{Ph}^{\text{F}}_2\text{Hg})]_3$  fragments (at the same level of theory) in vacuum and also checked whether the structures belong to the minimum PES, or not (Figure S9).

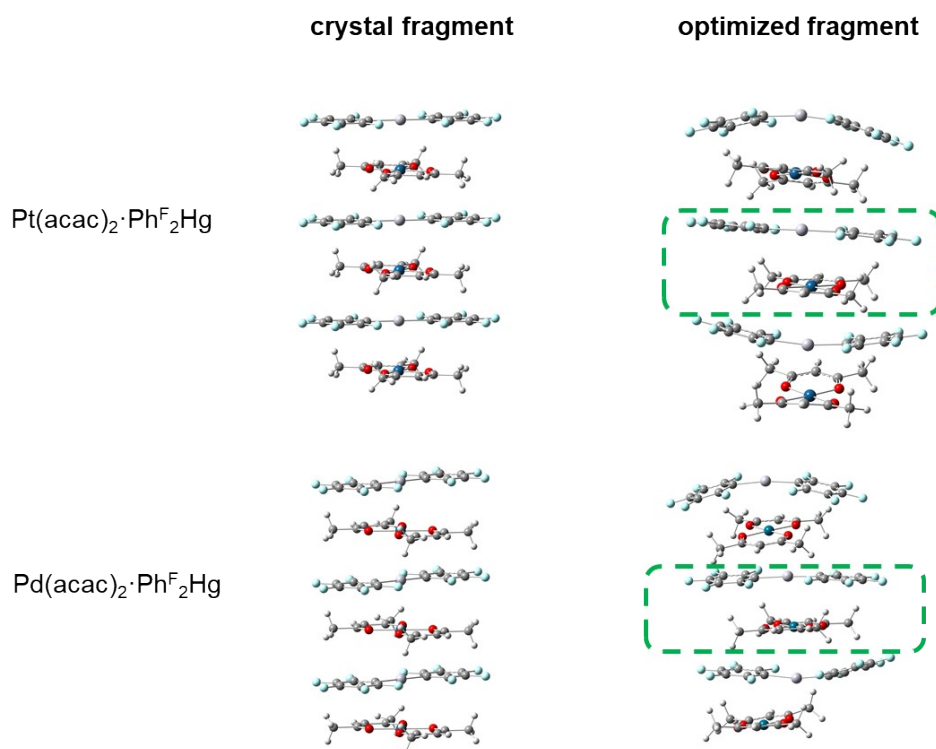

**Figure S9.** Left row: fragments of  $[M(\text{acac})_2(\text{Ph}^{\text{F}}_2\text{Hg})]_3$  ( $M = \text{Pt}, \text{Pd}$ ) from the experimental crystal structures; right row: optimized geometries of  $[M(\text{acac})_2(\text{Ph}^{\text{F}}_2\text{Hg})]_3$ . The green dashed line indicates the least deformed  $\text{Ph}^{\text{F}}_2\text{Hg} \cdot M(\text{acac})_2$  structure in the absence of crystal field, which was used for further theoretical analysis.

Notably, all three Hg···Pt/Pd contacts are preserved despite significant distortion of the terminal fragments during the gas phase optimization.

**Table S5.** Electron density properties in (3; -1) critical point between Hg and M are given on the right panel: the electron density with sign of second eigenvalue  $\lambda_2$   $\text{sign}(\lambda_2)\rho$ , Laplacian of electron density  $\nabla^2\rho$ , local electronic kinetic energy density  $G$ , local electronic potential energy density  $V$ .

|                                                                | $\text{sign}(\lambda_2)\rho,$<br><b>Bohr<sup>-3</sup></b> | $\nabla^2\rho,$<br><b>Bohr<sup>-5</sup></b> | $G,$<br><b>Hartree·Bohr<sup>-3</sup></b> | $V,$<br><b>Hartree·Bohr<sup>-3</sup></b> |
|----------------------------------------------------------------|-----------------------------------------------------------|---------------------------------------------|------------------------------------------|------------------------------------------|
| $\text{Ph}^{\text{F}}_2\text{Hg}\cdot\text{Pt}(\text{acac})_2$ | -0.0198                                                   | 0.0524                                      | 0.0136                                   | -0.0140                                  |
| $\text{Ph}^{\text{F}}_2\text{Hg}\cdot\text{Pd}(\text{acac})_2$ | -0.0184                                                   | 0.0507                                      | 0.0129                                   | -0.0131                                  |

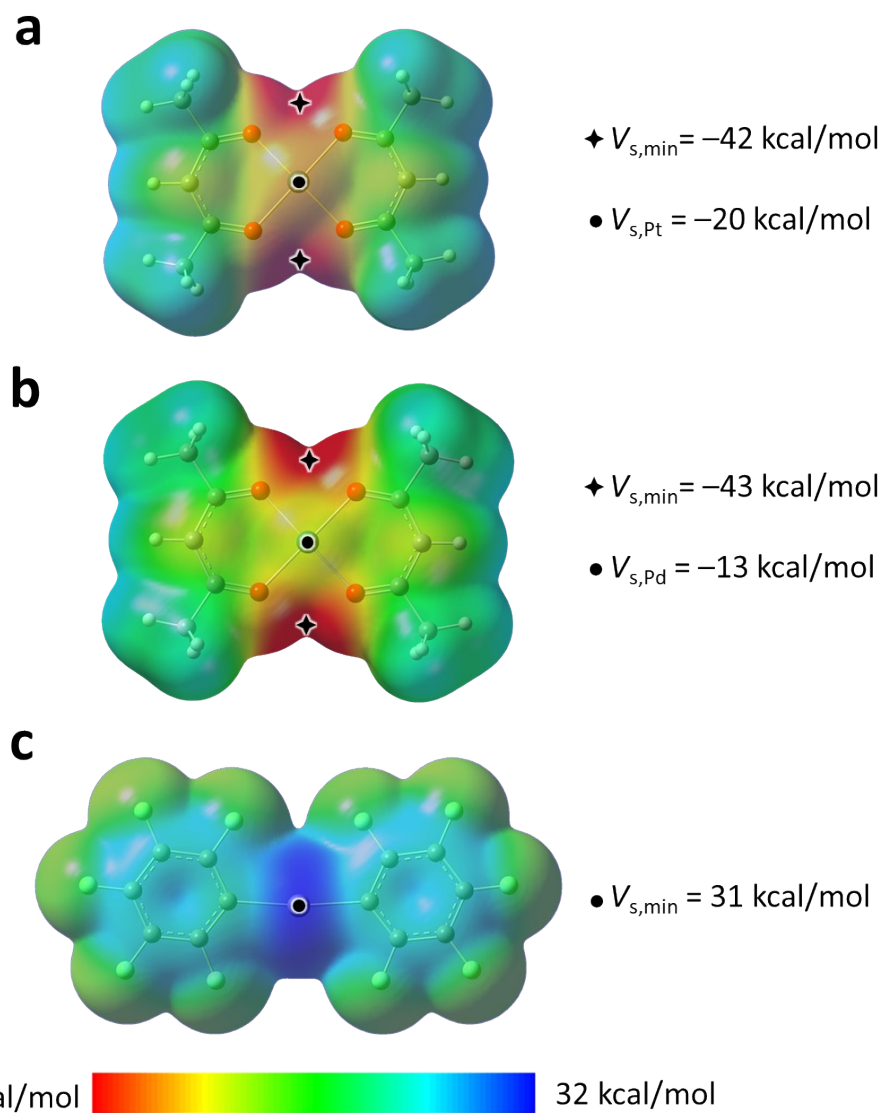

**Figure S10.** Distribution of MEP on electron density isosurface (0.001 a.u.) for (a)  $\text{Pt}(\text{acac})_2$ , (b)  $\text{Pd}(\text{acac})_2$ , and (c)  $\text{PhF}_2\text{Hg}$ . The values of the potential on the surface above any one of the metal atoms are shown.

In the structures of  $\text{Ph}^{\text{F}}_2\text{Hg}\cdot\text{Pt}(\text{acac})_2$  and  $\text{Ph}^{\text{F}}_2\text{Hg}\cdot\text{Pd}(\text{acac})_2$ , hydrogens of the methyl group are disordered in two equilibrium positions (1 and 2) with an occupancy of 0.5. Hydrogen bonds were found in one of these two configurations (position 2). To estimate the contribution of these interactions to the total energy, the corresponding theoretical calculations were carried out. Considering the disorder of hydrogens of the  $\text{CH}_3$  groups of the  $\text{Ph}^{\text{F}}_2\text{Hg}\cdot\text{Pt}(\text{acac})_2$  and  $\text{Ph}^{\text{F}}_2\text{Hg}\cdot\text{Pd}(\text{acac})_2$  complexes, we performed a two criteria test for the structures  $\text{Ph}^{\text{F}}_2\text{Hg}\cdot\text{Pt}(\text{acac})_2$  and  $\text{Ph}^{\text{F}}_2\text{Hg}\cdot\text{Pd}(\text{acac})_2$ . Our analysis revealed that short contacts (hydrogen bonds  $\text{CH}\cdots\text{F}$ ) are easily cleaved by the thermal motion (**Figures S11 and S12, Table S6**). It is clear from the latter that these interactions are quite weak, their energy value do not exceed 0.1 kcal and, consequently, they are far from being structure-determining.

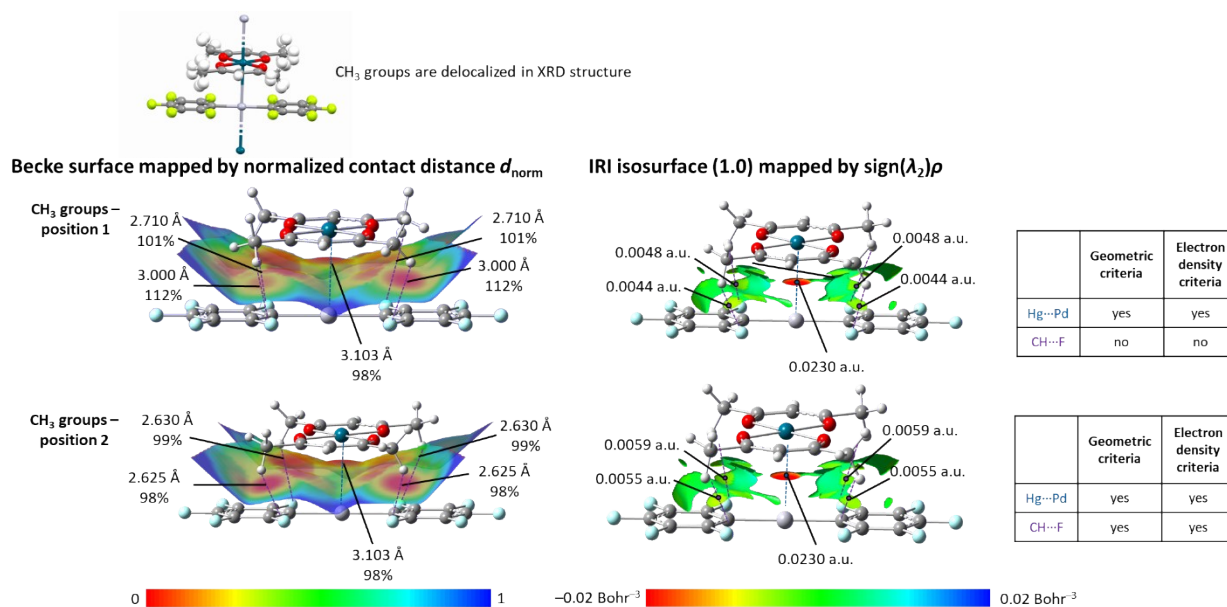

**Figure S11.** Theoretical analysis of  $\text{Ph}^{\text{F}}_2\text{Hg}\cdot\text{Pd}(\text{acac})_2$  with two types of the  $\text{CH}_3$  group localization. Left: Becke surface mapped by normalized contact distance  $d_{\text{norm}} = \frac{d_1 - r_1^{\text{vdW}}}{r_1^{\text{vdW}}} + \frac{d_2 - r_2^{\text{vdW}}}{r_2^{\text{vdW}}}$ , where  $d_1$  ( $d_2$ ) is the distance from a point on the surface to the nearest nucleus inside (outside) the surface,  $r_1^{\text{vdW}}$  and  $r_2^{\text{vdW}}$  denote van der Waals radius of atoms 1 and 2. Interatomic distances for contacts with low  $d_{\text{norm}}$  values and their percentage of the sum of van der Waals radii are given in black. Middle: IRI isosurface (1.0) mapped by  $\text{sign}(\lambda_2)\rho$ , electron density critical points of (3; -1) type and  $\rho$  values. Right: table summarizing the results of the two-criterion test for non-covalent interactions (see Computational Details section).

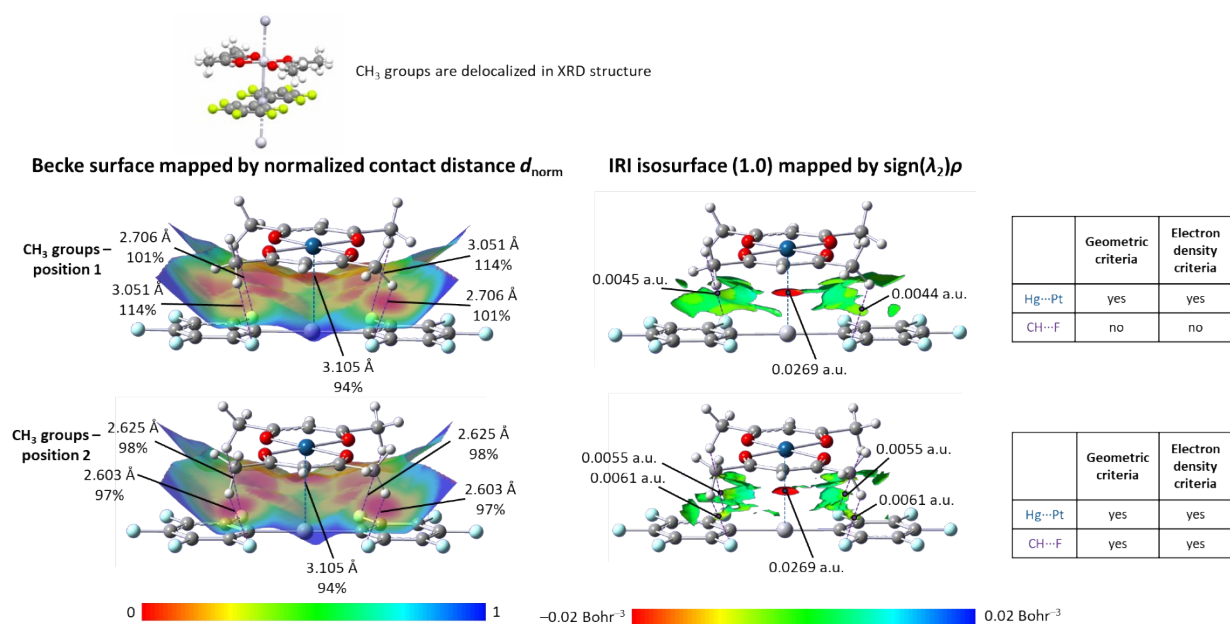

**Figure S12.** Theoretical analysis of Ph<sup>F</sup><sub>2</sub>Hg·Pt(acac)<sub>2</sub> with two types of the CH<sub>3</sub> group localization. Left: Becke surface mapped by normalized contact distance  $d_{\text{norm}} = \frac{d_1 - r_1^{\text{vdW}}}{r_1^{\text{vdW}}} + \frac{d_2 - r_2^{\text{vdW}}}{r_2^{\text{vdW}}}$ , where  $d_1$  ( $d_2$ ) is the distance from a point on the surface to the nearest nucleus inside (outside) the surface,  $r_1^{\text{vdW}}$  and  $r_2^{\text{vdW}}$  denote van der Waals radius of atoms 1 and 2. Interatomic distances for contacts with low  $d_{\text{norm}}$  values and their percentage of the sum of van der Waals radii are given in black. Middle: IRI isosurface (1.0) mapped by  $\text{sign}(\lambda_2)\rho$ , electron density critical points of (3; -1) type and  $\rho$  values. Right: table summarizing the results of the two-criterion test for non-covalent interactions (see Computational Details section).

**Table S6.** Decomposition of the interaction energy (SAPT0) between Ph<sup>F</sup><sub>2</sub>Hg and M(acac)<sub>2</sub> and fragments in the cocrystals.

|                                                                                       | $E_{\text{ES}}$ ,<br>kcal/mol | $E_{\text{EX}}$ ,<br>kcal/mol | $E_{\text{IND}}$ ,<br>kcal/mol | $E_{\text{DISP}}$ ,<br>kcal/mol | $E_{\text{TOT}}$ ,<br>kcal/mol |
|---------------------------------------------------------------------------------------|-------------------------------|-------------------------------|--------------------------------|---------------------------------|--------------------------------|
| Ph <sup>F</sup> <sub>2</sub> Hg·Pt(acac) <sub>2</sub><br>CH <sub>3</sub> – position 1 | -15.4                         | 23.7                          | -5.5                           | -20.2                           | -17.2                          |
| Ph <sup>F</sup> <sub>2</sub> Hg·Pt(acac) <sub>2</sub><br>CH <sub>3</sub> – position 2 | -14.7                         | 23.2                          | -5.4                           | -20.1                           | -17.1                          |
| Ph <sup>F</sup> <sub>2</sub> Hg·Pd(acac) <sub>2</sub><br>CH <sub>3</sub> – position 1 | -9.7                          | 18.6                          | -3.8                           | -17.8                           | -12.6                          |
| Ph <sup>F</sup> <sub>2</sub> Hg·Pd(acac) <sub>2</sub><br>CH <sub>3</sub> – position 2 | -10.1                         | 19.2                          | -3.8                           | -17.9                           | -12.6                          |

A partially dispersive nature of the Hg $\cdots$ Pt/Pd contacts is also shown through visualization of the van der Waals potential:<sup>2</sup> the dispersion contribution prevails over the exchange-repulsive contribution in the region above the metal atom.

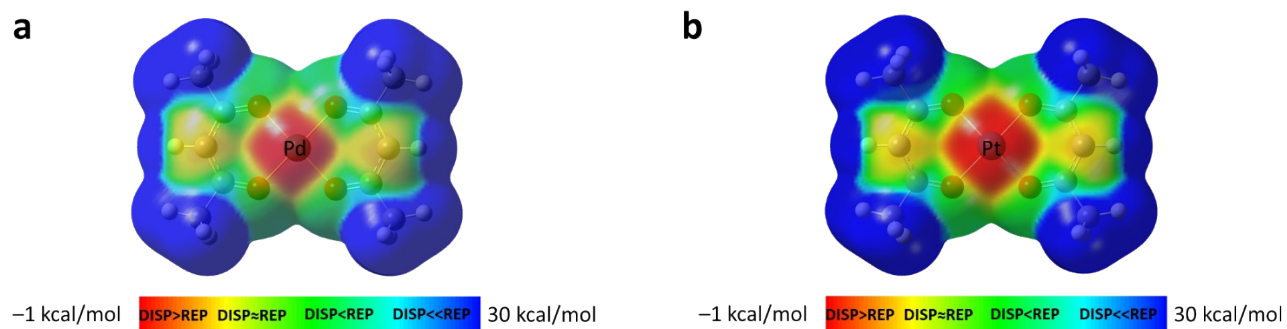

**Figure S13.** Van der Waals potential distribution on the ED isosurface ( $\rho = 0.001 \text{ e/Bohr}^3$ ) for (a) Pd(acac)<sub>2</sub> and (b) Pt(acac)<sub>2</sub>.



**S4. Cartesian coordinates for the studied  $[M(\text{acac})_2(\text{Ph}^{\text{F}}_2\text{Hg})]_3$  ( $M = \text{Pt}, \text{Pd}$ ) systems**

**Pt(acac)<sub>2</sub>(Ph<sup>F</sup><sub>2</sub>Hg)<sub>3</sub>**

|    |             |             |             |
|----|-------------|-------------|-------------|
| Hg | 1.36955200  | 0.19200600  | -1.16034200 |
| F  | 1.03379900  | 1.95074600  | 1.39245200  |
| F  | 1.02917800  | 2.71395600  | -3.27941700 |
| F  | 0.56843700  | 4.57313000  | 1.82754000  |
| O  | -2.05625100 | 1.84983700  | -1.63388800 |
| F  | 0.25366900  | 6.27310400  | -0.29312300 |
| O  | -1.64030800 | -1.03924100 | -1.88063600 |
| F  | 0.47207600  | 5.32175900  | -2.84788000 |
| C  | 0.65732400  | 4.50482600  | -1.80905200 |
| C  | 0.68862100  | 4.11816800  | 0.57523500  |
| C  | 0.52558600  | 4.99086700  | -0.50447400 |
| C  | -2.07212700 | 1.74802400  | -2.90984600 |
| C  | 1.09592300  | 2.26240000  | -0.95539900 |
| C  | -1.68741000 | -0.73004000 | -3.12390700 |
| C  | 0.95067900  | 2.77232100  | 0.32999400  |
| C  | -1.89519900 | 0.55947900  | -3.64433000 |
| H  | -1.92037400 | 0.64942300  | -4.72927100 |
| C  | -2.26989900 | 3.05526700  | -3.63223800 |
| C  | 0.94019400  | 3.15282500  | -2.00659000 |
| C  | -1.45681200 | -1.89362800 | -4.05143500 |
| H  | -1.35274700 | 3.65750200  | -3.54510100 |
| H  | -2.49061900 | 2.90975500  | -4.69732100 |

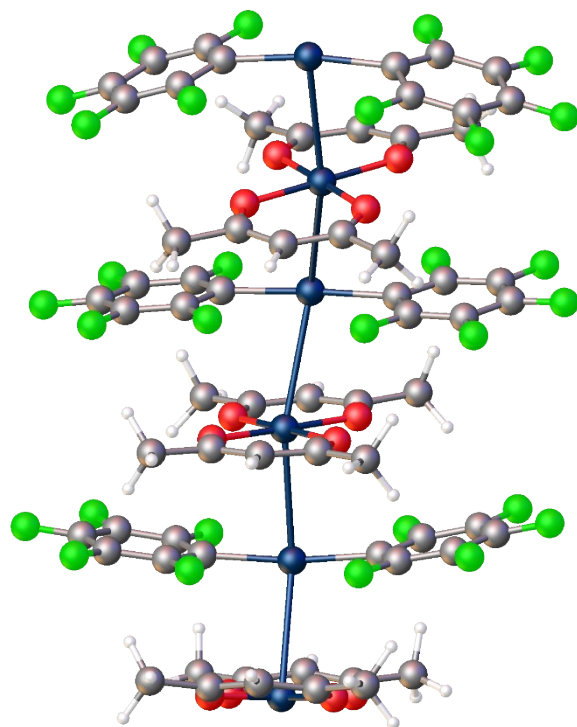

|   |             |             |             |
|---|-------------|-------------|-------------|
| H | -3.08692800 | 3.62018300  | -3.16451600 |
| H | -2.07628800 | -2.74655000 | -3.74297100 |
| H | -1.67582900 | -1.64276700 | -5.09713400 |
| H | -0.40080600 | -2.19706700 | -3.97227600 |
| F | 1.91895600  | -2.17073200 | -3.41134500 |
| F | 1.39466100  | -1.76225600 | 1.27692500  |
| F | 2.34268000  | -4.82157500 | -3.12834700 |
| O | -1.51598400 | -1.25968400 | 0.87112000  |
| F | 2.23777800  | -5.97139600 | -0.64836100 |
| O | -1.88167000 | 1.62866100  | 1.12304200  |
| F | 1.73134700  | -4.42648600 | 1.55087900  |
| C | 1.77470200  | -3.87189400 | 0.33390700  |
| C | 2.06702000  | -4.07888300 | -2.05454200 |
| C | 2.03255200  | -4.66700500 | -0.78651500 |
| C | -1.45717800 | -1.15752400 | 2.14764000  |
| C | 1.60697400  | -1.89098400 | -1.07983200 |
| C | -1.75417100 | 1.32613100  | 2.36232100  |
| C | 1.85191300  | -2.70535800 | -2.17456000 |
| C | -1.56014900 | 0.03556500  | 2.88282500  |
| H | -1.48116100 | -0.04793700 | 3.96559400  |
| C | -1.25591800 | -2.47117300 | 2.85462200  |
| H | -2.07829300 | -3.15190800 | 2.59356000  |
| H | -1.21462400 | -2.35612500 | 3.94520400  |
| H | -0.32075800 | -2.92939300 | 2.50150500  |
| C | 1.58342400  | -2.50225000 | 0.16909400  |

|    |             |             |             |
|----|-------------|-------------|-------------|
| C  | -1.82554300 | 2.51563600  | 3.28007700  |
| H  | -1.05410900 | 3.23974700  | 2.97862100  |
| H  | -1.68379000 | 2.24354200  | 4.33365500  |
| H  | -2.80275000 | 3.00576600  | 3.15973200  |
| Hg | -4.91983800 | -0.16272400 | -0.49210400 |
| Pt | -7.76315800 | -0.60870900 | 1.08122900  |
| F  | -4.80128100 | 1.61737000  | 2.12383500  |
| F  | -5.17581400 | 2.36892900  | -2.53502300 |
| F  | -4.77369200 | 4.27755200  | 2.55760800  |
| O  | -8.23639700 | 0.93180000  | -0.13061300 |
| F  | -4.87992500 | 6.00948300  | 0.44013800  |
| O  | -7.87105300 | -1.95003200 | -0.42171600 |
| F  | -5.05448600 | 5.03351300  | -2.11177700 |
| C  | -5.04353800 | 4.19738100  | -1.07066300 |
| C  | -4.89103200 | 3.81012200  | 1.30855400  |
| C  | -4.93679700 | 4.69872200  | 0.23048600  |
| C  | -8.22475900 | 0.85712900  | -1.40448700 |
| C  | -5.05641900 | 1.91279600  | -0.21391300 |
| C  | -7.90306600 | -1.62372600 | -1.65603000 |
| C  | -4.93111800 | 2.43866100  | 1.06560300  |
| C  | -8.01071600 | -0.31282400 | -2.16109000 |
| H  | -8.00895400 | -0.20189000 | -3.24620300 |
| C  | -8.44525500 | 2.16401300  | -2.12514900 |
| C  | -5.10177200 | 2.81727900  | -1.26359700 |
| C  | -7.77626700 | -2.77391200 | -2.62363900 |

|   |             |             |             |
|---|-------------|-------------|-------------|
| H | -8.52805100 | -2.70724600 | -3.42416400 |
| H | -7.88090000 | -3.72539700 | -2.08731500 |
| H | -7.54301200 | 2.41897500  | -2.70186500 |
| H | -9.28389200 | 2.08301800  | -2.83384700 |
| H | -8.64864100 | 2.96018600  | -1.39830100 |
| H | -6.78136000 | -2.73487200 | -3.09475200 |
| F | -4.45864600 | -2.22841500 | -2.98794900 |
| F | -4.32604600 | -2.31104400 | 1.74341600  |
| F | -3.54676100 | -4.77038800 | -3.05315100 |
| O | -7.22611400 | -2.13340800 | 2.26747200  |
| F | -3.09460600 | -6.12498100 | -0.71936400 |
| O | -7.58124800 | 0.74120800  | 2.55262900  |
| F | -3.51810400 | -4.88117800 | 1.68343000  |
| C | -3.76543100 | -4.23717000 | 0.53677400  |
| C | -3.78956000 | -4.18406200 | -1.87796900 |
| C | -3.54007400 | -4.87348000 | -0.68717400 |
| C | -6.74902500 | -1.98747100 | 3.44531900  |
| C | -4.48018100 | -2.21117500 | -0.61898600 |
| C | -7.05079500 | 0.49023000  | 3.68928500  |
| C | -4.25544100 | -2.87064000 | -1.81798900 |
| C | -6.63204100 | -0.77291800 | 4.14603900  |
| H | -6.19546700 | -0.81785300 | 5.14305600  |
| C | -6.28050800 | -3.27663400 | 4.06939800  |
| H | -7.09131600 | -4.01958600 | 4.01804300  |
| H | -5.95915000 | -3.15180500 | 5.11153000  |

|    |             |             |             |
|----|-------------|-------------|-------------|
| H  | -5.44186700 | -3.66669200 | 3.47182400  |
| C  | -4.20859700 | -2.91600400 | 0.54667000  |
| C  | -6.88230000 | 1.71054800  | 4.55696600  |
| H  | -7.84764700 | 2.23354100  | 4.63863500  |
| H  | -6.50617300 | 1.47031900  | 5.55981200  |
| H  | -6.18077400 | 2.39678500  | 4.05732800  |
| Pt | -1.77669800 | 0.29665600  | -0.37428200 |
| Hg | 7.49048400  | 0.32801800  | 0.73134200  |
| Pt | 4.39940200  | -0.12971600 | 0.14046900  |
| F  | 6.63511400  | 2.44866700  | 2.97209500  |
| F  | 7.30333500  | 2.41784400  | -1.71246500 |
| F  | 5.59621700  | 4.94044200  | 2.80774100  |
| O  | 4.44378200  | 1.31973000  | -1.26192700 |
| F  | 5.39500100  | 6.17533800  | 0.38089100  |
| O  | 4.85439500  | -1.57889300 | -1.18773100 |
| F  | 6.25669900  | 4.90943600  | -1.87453400 |
| C  | 6.38921400  | 4.31679600  | -0.68489100 |
| C  | 6.05021600  | 4.33454300  | 1.70842500  |
| C  | 5.93215900  | 4.96386500  | 0.46626700  |
| C  | 4.61023900  | 1.10197000  | -2.51561200 |
| C  | 7.05597000  | 2.38255900  | 0.64277800  |
| C  | 4.98749600  | -1.38379400 | -2.44626700 |
| C  | 6.60242500  | 3.05513100  | 1.77234600  |
| C  | 4.86364500  | -0.14675800 | -3.10657600 |
| H  | 4.98926800  | -0.15830900 | -4.18819700 |

|   |            |             |             |
|---|------------|-------------|-------------|
| C | 4.47107900 | 2.32933700  | -3.37463900 |
| C | 6.93575100 | 3.03755900  | -0.57838000 |
| C | 5.26447900 | -2.62992200 | -3.24495100 |
| H | 5.02297400 | 3.16466900  | -2.92504100 |
| H | 4.82710700 | 2.16211700  | -4.39920100 |
| H | 3.40640700 | 2.61018900  | -3.41267500 |
| H | 4.32418300 | -3.18707400 | -3.37994500 |
| H | 5.67168000 | -2.39912300 | -4.23773800 |
| H | 5.96454900 | -3.27695300 | -2.70242600 |
| F | 7.95304900 | -1.88251800 | -1.55693500 |
| F | 7.12537900 | -1.80179900 | 3.10154600  |
| F | 7.62990200 | -4.57015800 | -1.56433600 |
| O | 4.31782200 | -1.57528200 | 1.53139700  |
| F | 7.06303800 | -5.88107400 | 0.75888900  |
| O | 3.95001100 | 1.32331900  | 1.45678100  |
| F | 6.81769400 | -4.48864800 | 3.09322900  |
| C | 7.13422600 | -3.85084400 | 1.96372400  |
| C | 7.55132800 | -3.89170200 | -0.41683300 |
| C | 7.24361100 | -4.56579700 | 0.76801700  |
| C | 3.97445300 | -1.37740900 | 2.75142500  |
| C | 7.61473100 | -1.76940700 | 0.78424300  |
| C | 3.68042000 | 1.11622000  | 2.69341400  |
| C | 7.72452500 | -2.50767500 | -0.38947200 |
| C | 3.67368500 | -0.13471500 | 3.33398400  |
| H | 3.41004100 | -0.14195900 | 4.39039300  |

|   |            |             |            |
|---|------------|-------------|------------|
| C | 3.90401900 | -2.63807400 | 3.56824700 |
| C | 7.31189400 | -2.46736000 | 1.94872500 |
| C | 3.35829200 | 2.36625300  | 3.46771300 |
| H | 4.89527700 | -3.11366600 | 3.58931900 |
| H | 3.56984000 | -2.45408100 | 4.59703700 |
| H | 3.21302200 | -3.33689500 | 3.07377900 |
| H | 2.54343800 | 2.90410400  | 2.96319400 |
| H | 3.06776600 | 2.15040500  | 4.50366100 |
| H | 4.23854200 | 3.02482400  | 3.47310400 |

**[Pd(acac)<sub>2</sub>(Ph<sup>F</sup><sub>2</sub>Hg)]<sub>3</sub>**

|    |             |             |             |
|----|-------------|-------------|-------------|
| Hg | -1.20980800 | 0.39700500  | -0.88615400 |
| Pd | 1.88609900  | 0.70604000  | -0.17574700 |
| F  | -1.12376100 | -1.60636800 | 1.53468200  |
| O  | 2.06637400  | 2.26891500  | -1.43240200 |
| F  | -1.40542500 | -4.64859700 | -2.97519700 |
| O  | 1.89896700  | -0.62793500 | -1.67894400 |
| F  | -1.25537400 | -5.83933200 | -0.51621000 |
| F  | -1.37486600 | -1.95834200 | -3.18018300 |
| F  | -1.09221200 | -4.29746900 | 1.73784700  |
| C  | 2.22503700  | 3.49213800  | -3.42586300 |
| H  | 1.31566100  | 4.08237800  | -3.23987200 |
| H  | 2.34859000  | 3.36680600  | -4.50898500 |
| H  | 3.07598900  | 4.06019300  | -3.02649600 |
| C  | -1.21326700 | -1.70069600 | -0.83116000 |

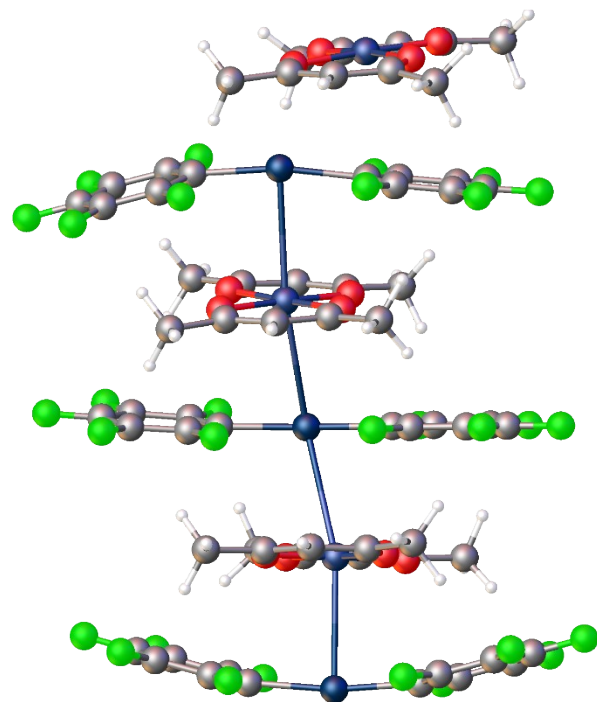

|   |             |             |             |
|---|-------------|-------------|-------------|
| C | 2.11719500  | 2.17128300  | -2.70508100 |
| C | 1.91365400  | -1.51059000 | -3.84681800 |
| H | 0.91798500  | -1.97294800 | -3.76721000 |
| H | 2.65879900  | -2.25506600 | -3.53378300 |
| H | 2.09454500  | -1.23126400 | -4.89268400 |
| C | -1.15834400 | -2.33560300 | 0.40431900  |
| C | -1.15703700 | -3.72266200 | 0.53114900  |
| C | -1.29990600 | -3.90370500 | -1.87251300 |
| C | -1.28702300 | -2.51141300 | -1.95351700 |
| C | 2.06846200  | 0.97567700  | -3.44596400 |
| H | 2.11730000  | 1.06531400  | -4.52993400 |
| C | -1.23897800 | -4.51562700 | -0.61672800 |
| C | 1.96870300  | -0.32370600 | -2.91782400 |
| F | -0.97042300 | 2.89944700  | -3.01593800 |
| O | 1.75014800  | -0.86362200 | 1.06502800  |
| F | -1.01511700 | 4.87766200  | 2.06648600  |
| O | 1.80423500  | 2.03553700  | 1.32122700  |
| F | -0.71577300 | 6.56515200  | -0.06837000 |
| F | -1.21272500 | 2.21806100  | 1.66160600  |
| F | -0.67681500 | 5.55622100  | -2.60862100 |
| C | 1.62262300  | -2.10483100 | 3.04603900  |
| H | 0.78497400  | -2.69815500 | 2.65290000  |
| H | 1.51109200  | -1.99516500 | 4.13235600  |
| H | 2.55197600  | -2.65408700 | 2.83511300  |
| C | -1.14668300 | 2.48457900  | -0.69162600 |



|    |             |             |             |
|----|-------------|-------------|-------------|
| C  | 1.66562200  | -0.77372700 | 2.33646300  |
| C  | 1.51747200  | 2.91157000  | 3.46995600  |
| C  | -1.00315000 | 3.36756000  | -1.75161300 |
| C  | -0.85615800 | 4.74247600  | -1.56650900 |
| C  | -1.01254200 | 4.39530000  | 0.81995000  |
| C  | -1.13365000 | 3.02687300  | 0.58788600  |
| C  | 1.61070700  | 0.42011700  | 3.07775400  |
| H  | 1.51088500  | 0.32692700  | 4.15798000  |
| C  | -0.85583800 | 5.26014600  | -0.26706500 |
| C  | 1.65788200  | 1.72390100  | 2.55247000  |
| H  | 2.38447500  | 3.57539900  | 3.34653400  |
| H  | 0.62345400  | 3.47938400  | 3.17203800  |
| H  | 1.42863300  | 2.62009600  | 4.52422300  |
| Hg | -7.41959400 | -0.30781300 | 0.41273400  |
| Pd | -4.26071000 | -0.37993200 | 0.10580100  |
| F  | -6.96900600 | -2.38951800 | 2.80913500  |
| O  | -4.35389100 | 1.05956300  | -1.29608100 |
| F  | -6.85756400 | -5.18017500 | -1.87010700 |
| O  | -4.46328800 | -1.85152100 | -1.25408200 |
| F  | -6.29743300 | -6.42749500 | 0.48999600  |
| F  | -7.47995900 | -2.54572700 | -1.89248300 |
| F  | -6.35759200 | -5.02505400 | 2.82957400  |
| C  | -4.32980400 | 2.08457800  | -3.40274600 |
| H  | -5.01981800 | 2.84309300  | -3.01086200 |
| H  | -4.56165700 | 1.88658200  | -4.45706500 |

|   |             |             |             |
|---|-------------|-------------|-------------|
| H | -3.30839400 | 2.49210600  | -3.33508800 |
| C | -7.30557300 | -2.40484900 | 0.46465100  |
| C | -4.40354100 | 0.83959400  | -2.55636200 |
| C | -4.58595600 | -2.93079000 | -3.33452400 |
| H | -5.27762800 | -3.64356300 | -2.86877000 |
| H | -3.58773500 | -3.39526900 | -3.35670200 |
| H | -4.89924200 | -2.73684300 | -4.36840800 |
| C | -7.00228000 | -3.06767900 | 1.64970900  |
| C | -6.67172400 | -4.42251500 | 1.68046200  |
| C | -6.92961700 | -4.50201500 | -0.72241900 |
| C | -7.25795800 | -3.14633900 | -0.71126600 |
| C | -4.48051300 | -0.42009000 | -3.17155200 |
| H | -4.52051100 | -0.43620700 | -4.25951600 |
| C | -6.62409900 | -5.14085600 | 0.48256500  |
| C | -4.51702900 | -1.66589300 | -2.51556600 |
| F | -7.29906700 | 1.81477100  | -2.00858200 |
| O | -4.11737000 | -1.81205900 | 1.49467700  |
| F | -6.27336200 | 4.47908900  | 2.63468600  |
| O | -4.07543200 | 1.09751200  | 1.44768300  |
| F | -6.04769900 | 5.75790200  | 0.23357000  |
| F | -6.99787400 | 1.87339000  | 2.71318900  |
| F | -6.56665400 | 4.42039900  | -2.08449000 |
| C | -3.71153800 | -2.84382000 | 3.55035500  |
| C | -7.22826600 | 1.78392900  | 0.35833700  |
| C | -3.88833500 | -1.59057800 | 2.73282700  |

|    |             |             |             |
|----|-------------|-------------|-------------|
| C  | -3.78695900 | 2.18909200  | 3.50025800  |
| C  | -7.09970900 | 2.46283700  | -0.84902100 |
| C  | -6.71365200 | 3.80202200  | -0.91013600 |
| C  | -6.56203600 | 3.83363700  | 1.50288500  |
| C  | -6.95035400 | 2.49403400  | 1.52166800  |
| C  | -3.78559600 | -0.32932400 | 3.34520700  |
| H  | -3.60754900 | -0.31575000 | 4.41925100  |
| C  | -6.43108800 | 4.48739000  | 0.27458400  |
| C  | -3.89043700 | 0.91517700  | 2.69992900  |
| H  | -2.86866700 | -3.41474500 | 3.13184600  |
| H  | -3.52111400 | -2.63238600 | 4.61015200  |
| H  | -4.61138000 | -3.46894000 | 3.45924700  |
| H  | -2.99082200 | 2.81639100  | 3.07540900  |
| H  | -4.73091100 | 2.74588400  | 3.41399300  |
| H  | -3.57805300 | 1.99984900  | 4.56087600  |
| Hg | 5.08525700  | 0.69590400  | 0.12475600  |
| Pd | 7.87935800  | -1.53271600 | 0.45097700  |
| F  | 4.76545600  | -1.73371400 | 2.23641000  |
| O  | 7.77118700  | -0.19183100 | -1.04971200 |
| F  | 4.47161100  | -3.84108400 | -2.77987800 |
| O  | 7.99140000  | -3.08731400 | -0.81157300 |
| F  | 4.36043600  | -5.47036600 | -0.60090700 |
| F  | 4.75692800  | -1.16342400 | -2.46056200 |
| F  | 4.46654600  | -4.39705800 | 1.92399800  |
| C  | 7.43198900  | 0.67052400  | -3.19725000 |

|   |            |             |             |
|---|------------|-------------|-------------|
| H | 6.40525300 | 1.02938100  | -3.01905500 |
| H | 7.53966400 | 0.41630300  | -4.25963300 |
| H | 8.11014800 | 1.49643300  | -2.93634800 |
| C | 4.80669300 | -1.37712300 | -0.10256500 |
| C | 7.69113000 | -0.50401700 | -2.28795500 |
| C | 7.84750200 | -4.31989800 | -2.79786200 |
| C | 4.69750500 | -2.23095200 | 0.98717000  |
| C | 4.54445800 | -3.60773600 | 0.84813000  |
| C | 4.54376000 | -3.31679000 | -1.54935600 |
| C | 4.70009800 | -1.94472200 | -1.36505900 |
| C | 7.77283200 | -1.80083900 | -2.81970300 |
| H | 7.68044100 | -1.89949500 | -3.90054600 |
| C | 4.47760600 | -4.15698200 | -0.43529700 |
| C | 7.89537800 | -2.99339900 | -2.07689200 |
| H | 8.49395100 | -5.04518700 | -2.28468300 |
| H | 6.81217800 | -4.69707900 | -2.75183700 |
| H | 8.13475800 | -4.23382600 | -3.85448100 |
| F | 5.21474800 | 3.01953300  | -2.07876200 |
| O | 7.80136800 | -2.87487000 | 1.93628400  |
| F | 4.02211700 | 5.32763100  | 2.71361300  |
| O | 7.67435300 | 0.01967900  | 1.71343500  |
| F | 4.02023300 | 6.82084400  | 0.42519900  |
| F | 4.61906000 | 2.69495500  | 2.60865900  |
| F | 4.62059200 | 5.65312100  | -1.96816800 |
| C | 7.37799600 | -3.78831400 | 4.04202100  |

|   |            |             |             |
|---|------------|-------------|-------------|
| H | 6.39907200 | -4.21431800 | 3.76544400  |
| H | 7.37671400 | -3.54188200 | 5.11176900  |
| H | 8.13853200 | -4.55454500 | 3.83050400  |
| C | 5.00244100 | 2.78982800  | 0.27141000  |
| C | 7.60926100 | -2.58578400 | 3.16077000  |
| C | 7.47075500 | 1.23019400  | 3.70675300  |
| H | 6.51433400 | 1.70427900  | 3.43768100  |
| H | 8.27218600 | 1.90073500  | 3.36055300  |
| H | 7.52339400 | 1.12246700  | 4.79791700  |
| C | 4.98119200 | 3.57653000  | -0.87434600 |
| C | 4.66422100 | 4.93480900  | -0.84382400 |
| C | 4.35619400 | 4.76912400  | 1.54811600  |
| C | 4.67907600 | 3.41466000  | 1.46915900  |
| C | 7.55831000 | -1.28967400 | 3.71325000  |
| H | 7.43466100 | -1.21429100 | 4.79285600  |
| C | 4.33786200 | 5.53231300  | 0.37714400  |
| C | 7.58693100 | -0.08988600 | 2.98647300  |

**Pt(acac)<sub>2</sub>**

|            |             |             |             |
|------------|-------------|-------------|-------------|
| O          | -1.39051100 | -1.46304600 | -0.03730400 |
| O          | -1.37943500 | 1.46616600  | -           |
| C          | -2.65310900 | -1.25272000 | -           |
| 0.02015000 |             |             |             |
| C          | -2.64465300 | 1.26379100  |             |
| 0.02144000 |             |             |             |
| C          | -3.27836600 | 0.00870200  |             |
| 0.01561700 |             |             |             |
| H          | -4.36696200 | 0.01177100  |             |
| C          | -3.48883500 | -2.50620000 | -0.00612100 |
| C          | -3.46150200 | 2.52485400  | 0.12093500  |
| H          | -3.40668400 | -2.98304900 | 0.98247100  |
| H          | -4.54792400 | -2.29920100 | -0.20555700 |
| H          | -3.10928700 | -3.21611300 | -0.75271100 |
| H          | -3.11482900 | 3.25493000  | -0.62282900 |
| H          | -4.53365000 | 2.33925900  | -0.02203300 |
| H          | -3.30640800 | 2.96132400  | 1.12039900  |
| O          | 1.38391000  | 1.45904600  | -0.03063100 |
| O          | 1.38049300  | -1.46304400 | 0.00265900  |
| C          | 2.64913200  | 1.25418200  | -0.00528000 |
| C          | 2.64510900  | -1.25593900 | 0.04068900  |
| C          | 3.27831800  | -0.00170100 | 0.03274100  |
| H          | 4.36684700  | -0.00359800 | 0.05921900  |
| C          | 3.47021200  | 2.51581200  | -0.01618600 |
| H          | 3.22596900  | 3.09831600  | -0.91556800 |

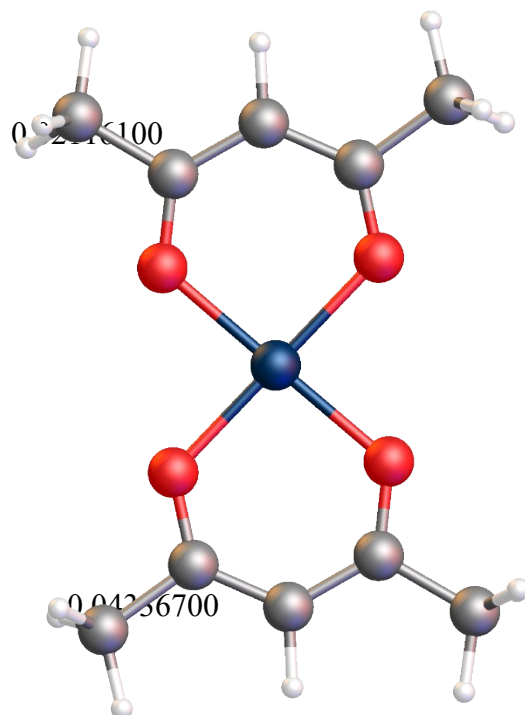

|    |            |             |             |
|----|------------|-------------|-------------|
| H  | 4.54843300 | 2.31216800  | 0.00050800  |
| H  | 3.20177200 | 3.12648800  | 0.85799800  |
| C  | 3.45787000 | -2.52000500 | 0.10273200  |
| H  | 3.13612000 | -3.10286900 | 0.97855700  |
| H  | 4.53583300 | -2.32468500 | 0.16598600  |
| H  | 3.25033900 | -3.12633300 | -0.79110300 |
| Pt | 0.00409900 | -0.00289800 | -0.02468900 |

**Pd(acac)<sub>2</sub>**

|    |             |             |             |
|----|-------------|-------------|-------------|
| Pd | -0.00417200 | -0.00569000 | -0.02813700 |
| O  | 1.39232000  | -1.45552700 | -           |
| O  | 1.37536500  | 1.45498500  | -           |
| C  | 3.49011500  | -2.50161400 | -           |
|    | 0.05625300  |             |             |
| H  | 3.29108300  | -3.08370900 |             |
|    | 0.85560900  |             |             |
| H  | 4.56444200  | -2.28425800 | -           |
|    | 0.10827400  |             |             |
| H  | 3.20323800  | -3.12317600 | -0.91512600 |
| C  | 2.65218700  | -1.24726700 | -0.03883700 |
| C  | 3.45445800  | 2.52482400  | 0.13108500  |
| H  | 3.26413400  | 3.00239200  | 1.10431400  |
| H  | 3.13253900  | 3.22047200  | -0.65626400 |
| H  | 4.53078500  | 2.33454100  | 0.03163000  |
| C  | 3.28174500  | 0.00986600  | 0.02465600  |
| H  | 4.37011000  | 0.01504300  | 0.05373900  |

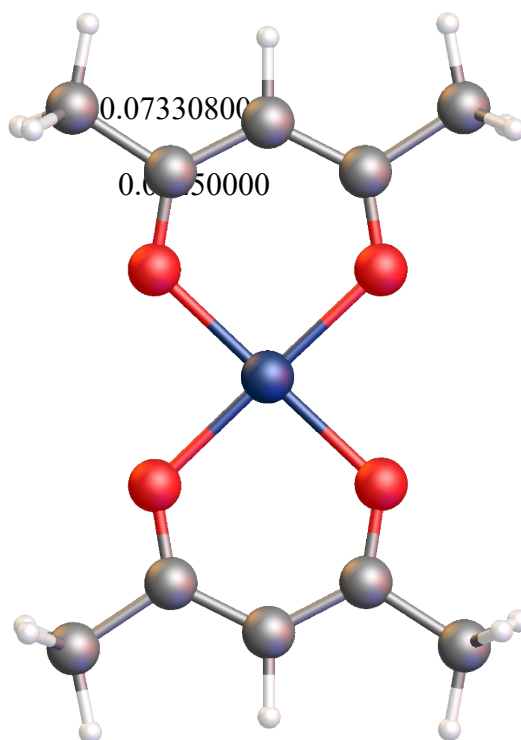

|   |             |             |             |
|---|-------------|-------------|-------------|
| C | 2.63767500  | 1.25962900  | 0.04800400  |
| O | -1.38229500 | 1.45123100  | -0.02627100 |
| O | -1.38285400 | -1.45968100 | -0.00968200 |
| C | -3.46704000 | 2.51557100  | -0.07406000 |
| H | -3.18757900 | 3.16142400  | 0.77034700  |
| H | -4.54503200 | 2.31324100  | -0.03472500 |
| H | -3.23826300 | 3.05856900  | -1.00286800 |
| C | -2.64400800 | 1.25160300  | -0.02728300 |
| C | -3.46298400 | -2.51463200 | 0.15415400  |
| C | -3.28154800 | -0.00129400 | 0.01249300  |
| H | -4.37015100 | -0.00136600 | 0.03439900  |
| C | -2.64370300 | -1.25441600 | 0.04151500  |
| H | -3.22095600 | -3.18583700 | -0.68161100 |
| H | -3.18199400 | -3.03207800 | 1.08352400  |
| H | -4.54211400 | -2.31522800 | 0.16086900  |

**Ph<sup>F</sup><sub>2</sub>Hg**

|    |             |             |             |
|----|-------------|-------------|-------------|
| Hg | -0.00033802 | 0.08631892  | 0.02893056  |
| F  | -2.24009100 | 2.42343526  | -0.41536636 |
| F  | -4.98335611 | -2.25980639 | 0.49158014  |
| F  | -6.36311252 | 0.07838344  | 0.04510225  |
| F  | -2.23196713 | -2.25637450 | 0.48458944  |
| F  | -4.99147997 | 2.42000366  | -0.40837414 |
| C  | -2.21032917 | 0.08356214  | 0.03454469  |
| C  | -2.91309527 | 1.27449689  | -0.19286723 |

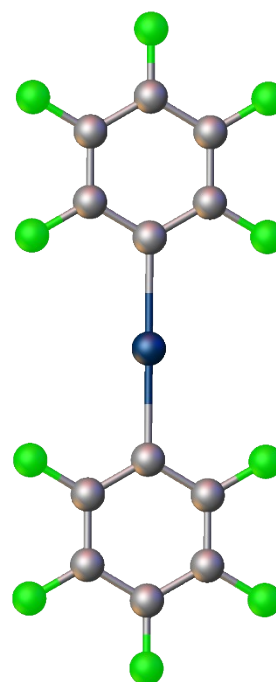



|   |             |             |             |
|---|-------------|-------------|-------------|
| C | -4.31448966 | 1.27274896  | -0.18930620 |
| C | -4.31035184 | -1.11086841 | 0.26907899  |
| C | -2.90895745 | -1.10912063 | 0.26551720  |
| C | -5.01311794 | 0.08006637  | 0.04166723  |
| F | 2.23941502  | -2.25079132 | 0.47325926  |
| F | 4.98268007  | 2.43244336  | -0.43372346 |
| F | 6.36243656  | 0.09426117  | 0.01279419  |
| F | 2.23129106  | 2.42900935  | -0.42674384 |
| F | 4.99080404  | -2.24735637 | 0.46628451  |
| C | 2.20965315  | 0.08907694  | 0.02332291  |
| C | 2.91241928  | -1.10185493 | 0.25074984  |
| C | 4.31381369  | -1.10010509 | 0.24719879  |
| C | 4.30967582  | 1.28350734  | -0.21121212 |
| C | 2.90828142  | 1.28175824  | -0.20765720 |
| C | 5.01244195  | 0.09257561  | 0.01621556  |

### COJBEJ

|    |             |             |             |
|----|-------------|-------------|-------------|
| Hg | 1.25591000  | -2.30461800 | -0.19116600 |
| C  | -0.58938000 | -3.24247000 | -0.14243000 |
| C  | -1.30157100 | -3.51028000 | -1.29929600 |
| C  | -2.56772800 | -4.07892500 | -1.29437400 |
| C  | -3.15033200 | -4.35221200 | -0.06699400 |
| C  | -2.47087000 | -4.05992400 | 1.10329800  |
| C  | -1.21352900 | -3.55682800 | 1.04331900  |
| F  | -0.76734200 | -3.22084400 | -2.50344000 |

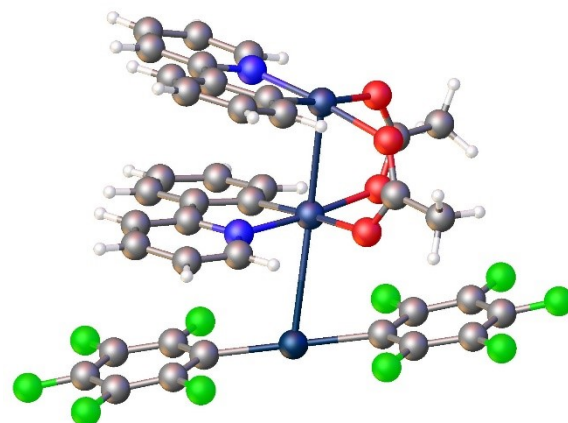

|    |             |             |             |
|----|-------------|-------------|-------------|
| F  | -3.22491200 | -4.32062000 | -2.42902100 |
| F  | -4.40927200 | -4.84318300 | -0.03492900 |
| F  | -3.07754700 | -4.35022600 | 2.27962400  |
| F  | -0.58488100 | -3.30478600 | 2.20299800  |
| Pd | -0.76050700 | 0.02441700  | 0.20728900  |
| Pd | -2.56845600 | 2.21221300  | 0.12241700  |
| O  | -2.12850700 | -0.76094000 | 1.55371500  |
| O  | -3.32670900 | 1.12538500  | 1.78842500  |
| O  | -1.99717200 | -0.54299900 | -1.40128100 |
| O  | -3.62596000 | 0.99834800  | -1.18303200 |
| C  | 3.10120000  | -1.36676600 | -0.23990200 |
| C  | 3.81339100  | -1.09895600 | 0.91696400  |
| C  | 5.07954900  | -0.53031100 | 0.91204200  |
| C  | 5.66215200  | -0.25702400 | -0.31533800 |
| C  | 4.98269000  | -0.54931200 | -1.48563000 |
| C  | 3.72534900  | -1.05240800 | -1.42565200 |
| C  | 0.44702800  | 0.28468700  | 2.95637000  |
| H  | -0.24287200 | -0.28828900 | 3.26653400  |
| C  | 1.38087200  | 0.79772100  | 3.86311900  |
| H  | 1.33252000  | 0.56890800  | 4.78321000  |
| C  | 2.38082600  | 1.64688000  | 3.40258800  |
| H  | 3.01237300  | 2.00843200  | 4.01307900  |
| C  | 2.45868100  | 1.96382600  | 2.07105600  |
| H  | 3.14431900  | 2.54427200  | 1.76144100  |
| C  | 1.52972000  | 1.43707200  | 1.16863100  |

|   |             |            |             |
|---|-------------|------------|-------------|
| C | 1.54233500  | 1.61834100 | -0.28440400 |
| C | 2.44533100  | 2.41693800 | -0.97821800 |
| H | 3.08015400  | 2.94445400 | -0.50892400 |
| C | 2.40841700  | 2.42956700 | -2.34772300 |
| H | 3.02777000  | 2.96403400 | -2.83061800 |
| C | 1.47414800  | 1.67188100 | -3.03353800 |
| H | 1.45926000  | 1.66930800 | -3.98342700 |
| C | 0.56852600  | 0.92407900 | -2.32352800 |
| H | -0.08269800 | 0.41380500 | -2.79074800 |
| C | 0.51515400  | 0.60441300 | 1.61941300  |
| C | -1.23277400 | 3.33425100 | 2.55386000  |
| H | -1.72057500 | 2.68398100 | 3.04477500  |
| C | -0.36129300 | 4.16811500 | 3.21925400  |
| H | -0.25998000 | 4.09548200 | 4.16093100  |
| C | 0.36231500  | 5.10755300 | 2.51964200  |
| H | 0.95252200  | 5.69683200 | 2.97520500  |
| C | 0.22123000  | 5.18724400 | 1.12649700  |
| H | 0.73945400  | 5.80510000 | 0.62207600  |
| C | -0.67971300 | 4.35810000 | 0.50201000  |
| C | -1.00041600 | 4.35392000 | -0.94690600 |
| C | -0.47555800 | 5.25323900 | -1.86106200 |
| H | 0.16746300  | 5.89581600 | -1.58516600 |
| C | -0.89369500 | 5.21261400 | -3.17397000 |
| H | -0.54448400 | 5.83083500 | -3.80672200 |
| C | -1.82394100 | 4.26626000 | -3.56337100 |

|   |             |             |             |
|---|-------------|-------------|-------------|
| H | -2.11856700 | 4.24079400  | -4.46671500 |
| C | -2.32584600 | 3.36798500  | -2.66893200 |
| H | -2.95218200 | 2.71290700  | -2.95640100 |
| C | -1.92243900 | 3.40314100  | -1.31836300 |
| C | -3.03077000 | -0.06602500 | 2.09208900  |
| C | -3.79295600 | -0.71468800 | 3.20521000  |
| H | -4.56603000 | -0.15932800 | 3.43749600  |
| H | -4.09931700 | -1.59867900 | 2.91834500  |
| H | -3.21080300 | -0.80779000 | 3.98848700  |
| C | -3.13014200 | -0.04592500 | -1.69838500 |
| C | -3.93745600 | -0.73969300 | -2.74697400 |
| H | -4.33162300 | -0.07674500 | -3.34910300 |
| H | -3.35778700 | -1.34161700 | -3.26053800 |
| H | -4.65043400 | -1.25939500 | -2.31988800 |
| F | 3.27916200  | -1.38839200 | 2.12110800  |
| F | 5.73673300  | -0.28861600 | 2.04668900  |
| F | 6.92109300  | 0.23394700  | -0.34740300 |
| F | 5.58936700  | -0.25901000 | -2.66195600 |
| F | 3.09670200  | -1.30445000 | -2.58533000 |
| N | 0.59649300  | 0.90147200  | -0.94196200 |
| N | -1.41294900 | 3.42454800  | 1.19818700  |

**COJBEJ with PhF replaced by H atom**

|    |             |             |             |
|----|-------------|-------------|-------------|
| Hg | 1.25591000  | -2.30461800 | -0.19116600 |
| Pd | -0.76050700 | 0.02441700  | 0.20728900  |

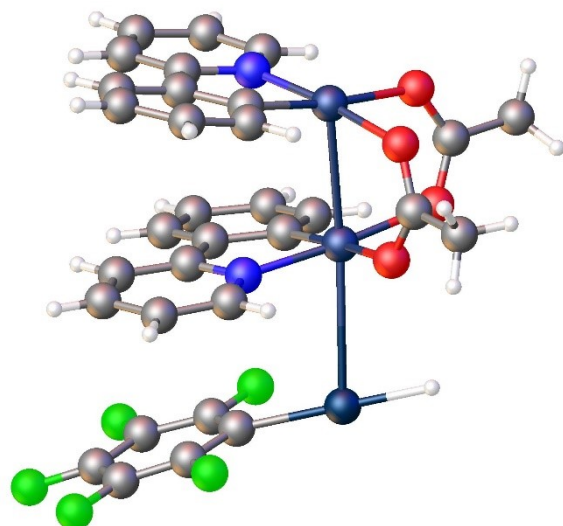

|    |             |             |             |
|----|-------------|-------------|-------------|
| Pd | -2.56845600 | 2.21221300  | 0.12241700  |
| O  | -2.12850700 | -0.76094000 | 1.55371500  |
| O  | -3.32670900 | 1.12538500  | 1.78842500  |
| O  | -1.99717200 | -0.54299900 | -1.40128100 |
| O  | -3.62596000 | 0.99834800  | -1.18303200 |
| C  | 3.10120000  | -1.36676600 | -0.23990200 |
| C  | 3.81339100  | -1.09895600 | 0.91696400  |
| C  | 5.07954900  | -0.53031100 | 0.91204200  |
| C  | 5.66215200  | -0.25702400 | -0.31533800 |
| C  | 4.98269000  | -0.54931200 | -1.48563000 |
| C  | 3.72534900  | -1.05240800 | -1.42565200 |
| C  | 0.44702800  | 0.28468700  | 2.95637000  |
| H  | -0.24287200 | -0.28828900 | 3.26653400  |
| C  | 1.38087200  | 0.79772100  | 3.86311900  |
| H  | 1.33252000  | 0.56890800  | 4.78321000  |
| C  | 2.38082600  | 1.64688000  | 3.40258800  |
| H  | 3.01237300  | 2.00843200  | 4.01307900  |
| C  | 2.45868100  | 1.96382600  | 2.07105600  |
| H  | 3.14431900  | 2.54427200  | 1.76144100  |
| C  | 1.52972000  | 1.43707200  | 1.16863100  |
| C  | 1.54233500  | 1.61834100  | -0.28440400 |
| C  | 2.44533100  | 2.41693800  | -0.97821800 |
| H  | 3.08015400  | 2.94445400  | -0.50892400 |
| C  | 2.40841700  | 2.42956700  | -2.34772300 |
| H  | 3.02777000  | 2.96403400  | -2.83061800 |

|   |             |             |             |
|---|-------------|-------------|-------------|
| C | 1.47414800  | 1.67188100  | -3.03353800 |
| H | 1.45926000  | 1.66930800  | -3.98342700 |
| C | 0.56852600  | 0.92407900  | -2.32352800 |
| H | -0.08269800 | 0.41380500  | -2.79074800 |
| C | 0.51515400  | 0.60441300  | 1.61941300  |
| C | -1.23277400 | 3.33425100  | 2.55386000  |
| H | -1.72057500 | 2.68398100  | 3.04477500  |
| C | -0.36129300 | 4.16811500  | 3.21925400  |
| H | -0.25998000 | 4.09548200  | 4.16093100  |
| C | 0.36231500  | 5.10755300  | 2.51964200  |
| H | 0.95252200  | 5.69683200  | 2.97520500  |
| C | 0.22123000  | 5.18724400  | 1.12649700  |
| H | 0.73945400  | 5.80510000  | 0.62207600  |
| C | -0.67971300 | 4.35810000  | 0.50201000  |
| C | -1.00041600 | 4.35392000  | -0.94690600 |
| C | -0.47555800 | 5.25323900  | -1.86106200 |
| H | 0.16746300  | 5.89581600  | -1.58516600 |
| C | -0.89369500 | 5.21261400  | -3.17397000 |
| H | -0.54448400 | 5.83083500  | -3.80672200 |
| C | -1.82394100 | 4.26626000  | -3.56337100 |
| H | -2.11856700 | 4.24079400  | -4.46671500 |
| C | -2.32584600 | 3.36798500  | -2.66893200 |
| H | -2.95218200 | 2.71290700  | -2.95640100 |
| C | -1.92243900 | 3.40314100  | -1.31836300 |
| C | -3.03077000 | -0.06602500 | 2.09208900  |

|   |             |             |             |
|---|-------------|-------------|-------------|
| C | -3.79295600 | -0.71468800 | 3.20521000  |
| H | -4.56603000 | -0.15932800 | 3.43749600  |
| H | -4.09931700 | -1.59867900 | 2.91834500  |
| H | -3.21080300 | -0.80779000 | 3.98848700  |
| C | -3.13014200 | -0.04592500 | -1.69838500 |
| C | -3.93745600 | -0.73969300 | -2.74697400 |
| H | -4.33162300 | -0.07674500 | -3.34910300 |
| H | -3.35778700 | -1.34161700 | -3.26053800 |
| H | -4.65043400 | -1.25939500 | -2.31988800 |
| F | 3.27916200  | -1.38839200 | 2.12110800  |
| F | 5.73673300  | -0.28861600 | 2.04668900  |
| F | 6.92109300  | 0.23394700  | -0.34740300 |
| F | 5.58936700  | -0.25901000 | -2.66195600 |
| F | 3.09670200  | -1.30445000 | -2.58533000 |
| N | 0.59649300  | 0.90147200  | -0.94196200 |
| N | -1.41294900 | 3.42454800  | 1.19818700  |
| H | -0.29481673 | -3.09276087 | -0.15020972 |

## S5. References

1. A. Bondi, Van der Waals Volumes and Radii, *The Journal of Physical Chemistry*, 1964, **68**, 441–451.
2. T. Lu and Q. Chen, van der Waals potential: an important complement to molecular electrostatic potential in studying intermolecular interactions, *Journal of Molecular Modeling*, 2020, **26**, 315.
